# Supplementary material for: Biphenylene monolayer: a novel nonbenzenoid carbon allotrope with potential application as an anode material for high-performance sodium-ion batteries
Source: Royal Society of Chemistry journal article supplement (doi:10.1039/d2cp00798c), 2022-01-01
Supplement: d2cp00798c1.pdf [file d2cp00798c1.pdf]

**Supplementary Information**

**Biphenylene Monolayer: A Novel Nonbenzenoid Carbon allotrope  
with Potential Applications as Anode Materials for High-  
performance Sodium Ion Batteries**

Ting Han<sup>a</sup>, Yu Liu<sup>a</sup>, Xiaodong Lv<sup>b,c,\*</sup> and Fengyu Li<sup>a,\*</sup>

<sup>a</sup> *School of Physical Science and Technology, Inner Mongolia University, Hohhot, 010021, China*

<sup>b</sup> *CAS Key Laboratory of Magnetic Materials and Devices & Zhejiang Province Key Laboratory of Magnetic Materials and Application Technology, Ningbo Institute of Materials Technology and Engineering, Chinese Academy of Sciences, Ningbo 315201, China*

<sup>c</sup> *Ganjiang Innovation Academy, Chinese Academy of Sciences, Ganzhou 341000, People's Republic of China*

\*Corresponding authors: [lvxiaodong@nimte.ac.cn](mailto:lvxiaodong@nimte.ac.cn) (XL); [fengyuli@imu.edu.cn](mailto:fengyuli@imu.edu.cn) (FL)

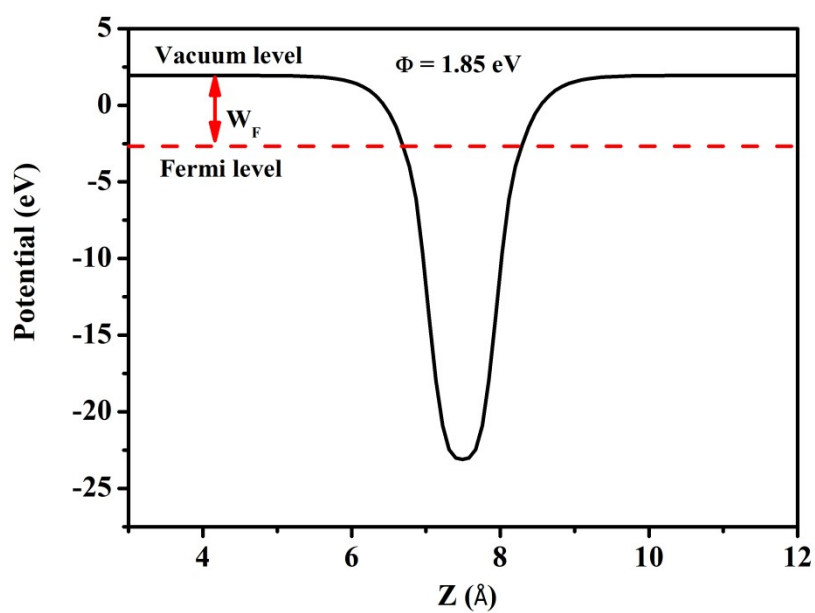

**Fig. S1** The electrostatic potential along the z-direction.

The work function ( $W_F$ ) of two-dimensional biphenylene was calculated via the following expression:

$$W_F = \Phi - E_F$$

where  $\Phi$  is the electrostatic energy in the vacuum away from the surface,  $E_F$  is the Fermi energy.

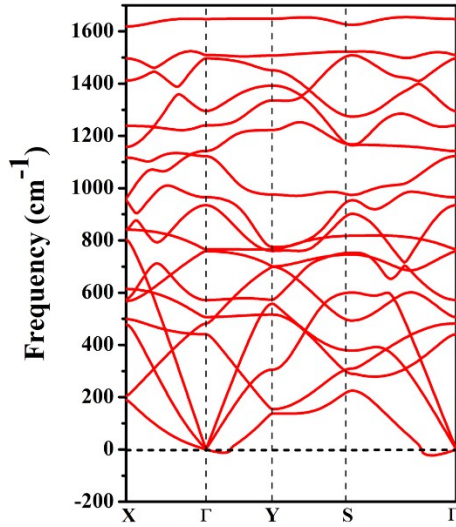

**Fig. S2** The calculated phonon spectra of the 2D biphenylene monolayers. The small “U-shape” negative values near gamma point is a signature of the flexural acoustic mode but not instability, and is a common phenomenon in first-principles calculations of 2D materials.<sup>[Ref.S1]</sup>

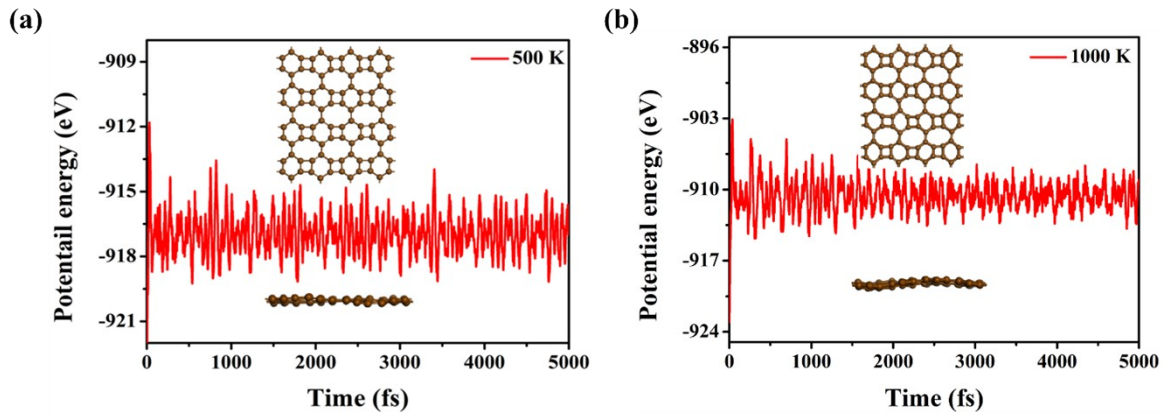

**Fig. S3** Variation in potential energy at 500 (a) and 1000 K (b), and the inset is the final structure of biphenylene during 5 ps’ FPMD simulation. C atoms are represented by brown balls.

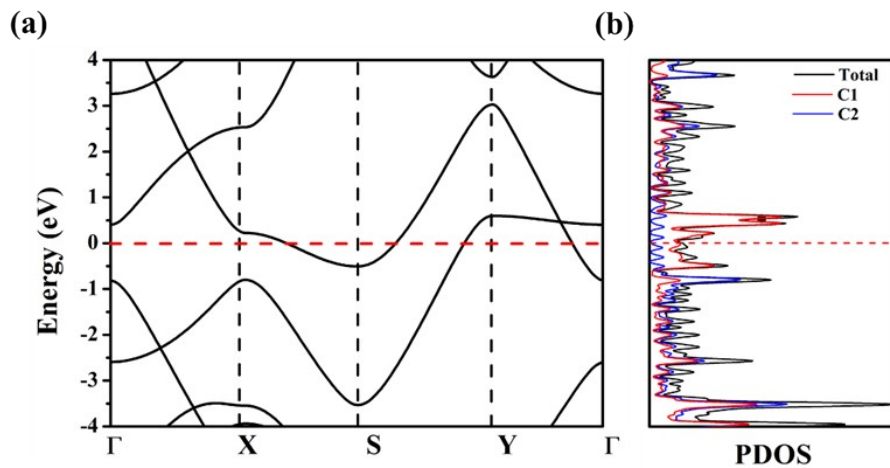

**Fig. S4** The band structure (a) and the partial density of states (b) of the biphenylene monolayer. The Fermi energy is set to 0 eV as indicated by the red horizontal dashed lines.

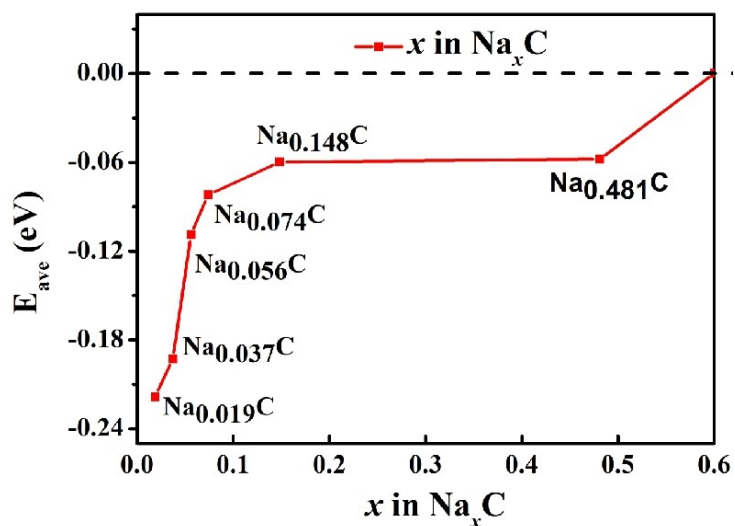

**Fig. S5** The average energy per Na ( $E_{\text{ave}}$ ) in  $\text{Na}_x\text{C}$  with respect to biphenylene monolayer and Na bulk bcc metal.

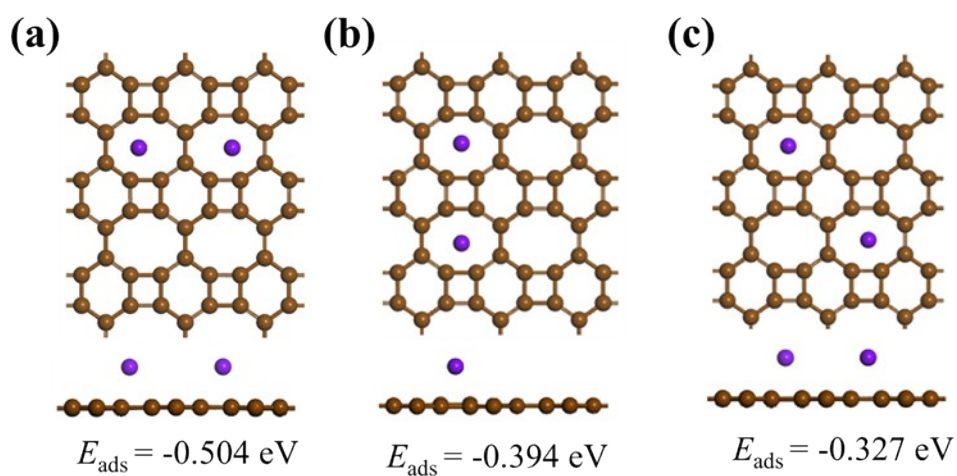

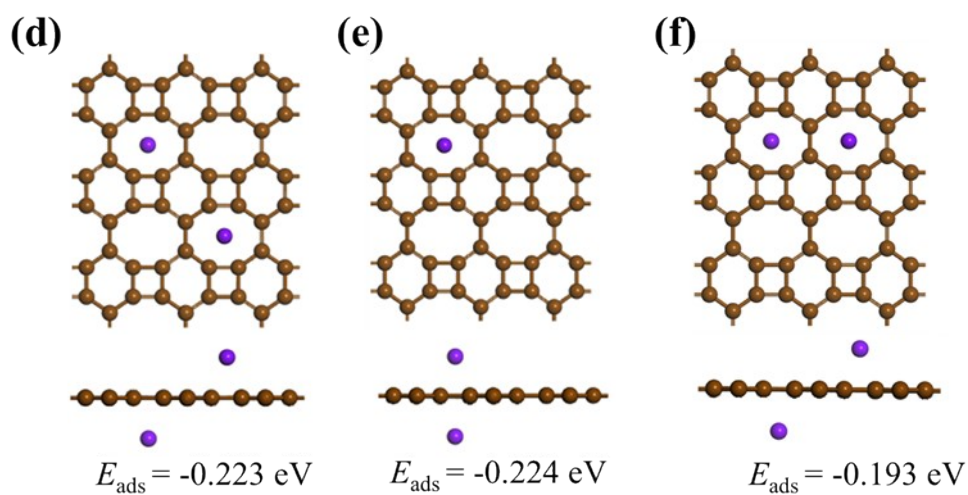

**Fig. S6** The optimized configurations and the corresponding average adsorption energies of Na for  $\text{Na}_{0.056}\text{C}$ . The brown and purple balls represent carbon and sodium, respectively.

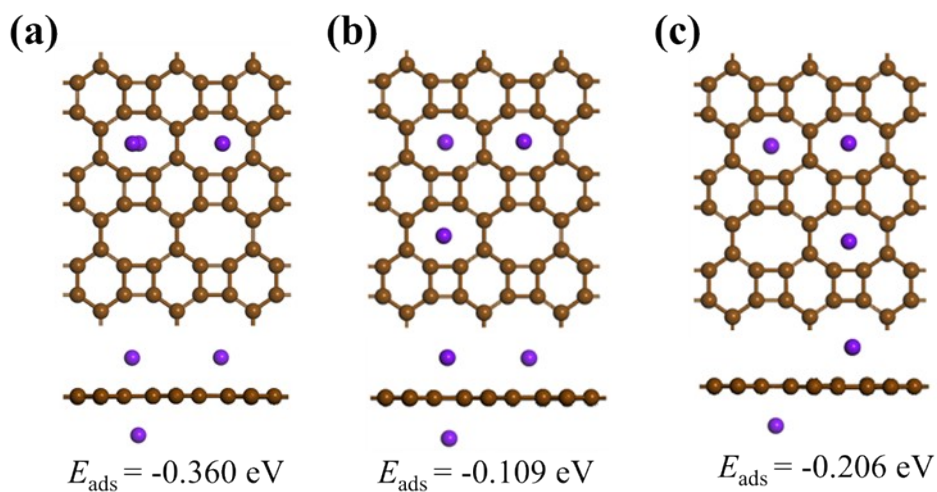

**Fig. S7** The optimized configurations and the corresponding average adsorption energies of Na for  $\text{Na}_{0.074}\text{C}$ . The brown and purple balls represent carbon and sodium, respectively.

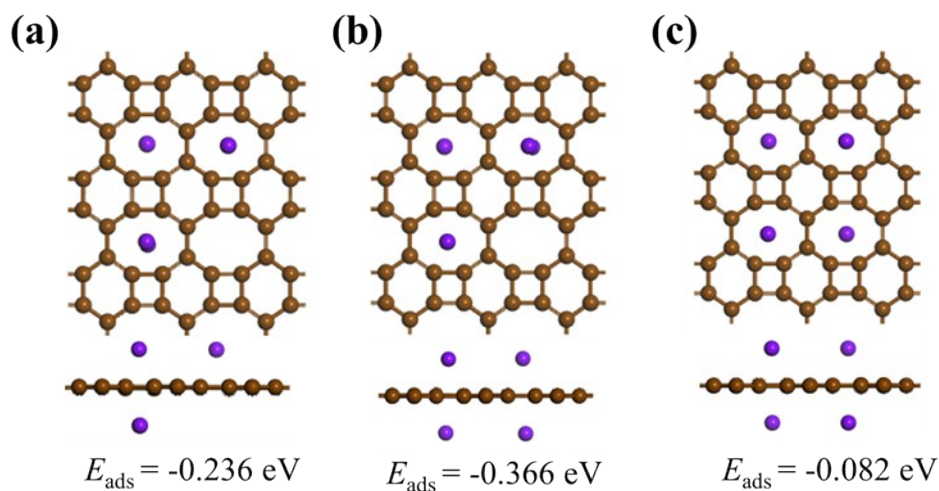

**Fig. S8** The optimized configurations and the corresponding average adsorption energies of Na for  $\text{Na}_{0.074}\text{C}$ . The brown and purple balls represent carbon and sodium, respectively.

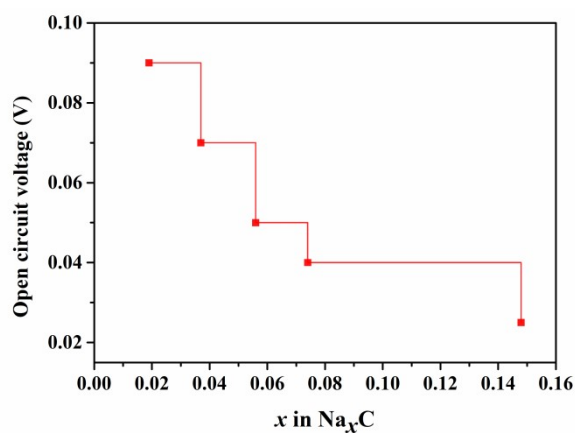

**Fig. S9** The open circuit voltage profile as a function of Na concentration.

The OCV can be evaluated from the following common half-cell reaction of the charge/discharge process:

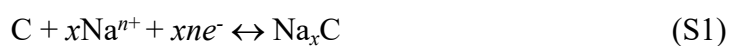

when the volume and entropy effects during the sodiation process were neglected, the OCV can be derived from the average adsorption energy ( $E_{\text{ave}}$ ) as:

$$\text{OCV} = -E_{\text{ave}}/xne \quad (\text{S2a})$$

$$E_{\text{ave}} = (E_{\text{C}} - E_{\text{Na}x\text{C}} - xE_{\text{Na-bulk}})/x \quad (\text{S2b})$$

where  $E_{\text{C}}$ ,  $E_{\text{Na}x\text{C}}$ , and  $E_{\text{Na-bulk}}$  are the energy of pristine biphenylene monolayer, the total energy of Na adsorbed biphenylene monolayer, and the energy per Na atom in the sodium *bcc* bulk, respectively,  $n$  is the number of valence electron ( $n = 1$  for Na),  $x$  is the chemical content of sodium atoms.

**Table S1.** The calculated lattice constant ( $a$ ,  $b$ , in Å), lattice change of biphenylene monolayer without and with adsorbed Na atoms.

|                       | $a$ (Å) | $b$ (Å) | Lattice variation (%) |      |
|-----------------------|---------|---------|-----------------------|------|
| C                     | 11.298  | 13.557  |                       |      |
| Na <sub>0.019</sub> C | 11.311  | 13.566  | 0.12                  | 0.07 |
| Na <sub>0.037</sub> C | 11.318  | 13.566  | 0.18                  | 0.07 |
| Na <sub>0.056</sub> C | 11.326  | 13.566  | 0.25                  | 0.07 |
| Na <sub>0.074</sub> C | 11.331  | 13.566  | 0.29                  | 0.07 |
| Na <sub>0.148</sub> C | 11.357  | 13.566  | 0.52                  | 0.07 |
| Na <sub>0.481</sub> C | 11.440  | 13.579  | 1.26                  | 0.16 |

**Reference:**

[Ref.S1] (a) H. Yin, G. Zheng, Y. Wang and B. Yao, *Phys. Chem. Chem. Phys.*, 2018, **20**, 19177–19187; (b) V. Zólyomi, N. D. Drummond and V. I. Fal'ko, *Phys. Rev. B*, 2014, **89**, 205416.
